# Supplementary material for: El Cerro de la Encantada (Granatula de Calatrava)
Source: Royal Society of Chemistry journal article supplement (doi:10.1039/d3ra02554c), 1983-01-01
Supplement: d3ra02554c1.pdf [file d3ra02554c1.pdf]

## Supporting Information

### **Kinetic Analysis of Silicon-Lithium Alloying Reaction in Silicon Single Crystal Using Soft X-ray Absorption Spectroscopy**

Nur Chamidah<sup>a</sup>, Akito Suzuki<sup>a</sup>, Takeshi Shimizu<sup>a</sup>, Chengchao Zhong<sup>a</sup>, Keiji Shimoda<sup>a</sup>,  
Ken-ichi Okazaki<sup>a</sup>, Toyonari Yaji<sup>b</sup>, Koji Nakanishi<sup>c</sup>, Motoaki Nishijima<sup>d</sup>, Hajime  
Kinoshita<sup>d</sup>, Yuki Orikasa<sup>a</sup>

<sup>a</sup> Department of Applied Chemistry, Graduate School of Life Sciences, Ritsumeikan University, 1-1-1 Nojihigashi, Kusatsu, Shiga 525-8577, Japan

<sup>b</sup> Research Organization of Science and Engineering, Ritsumeikan University, 1-1-1 Nojihigashi, Kusatsu, Shiga 525-8577, Japan

<sup>c</sup> Laboratory of Advanced Science and Technology for Industry, University of Hyogo, 3-1-2 Koto, Kamigori-cho, Ako-gun, Hyogo 678-1205, Japan

<sup>d</sup> KRI Inc, 134 Chudojiminami-machi, Shimogyo-ku, Kyoto 600-8813, Japan

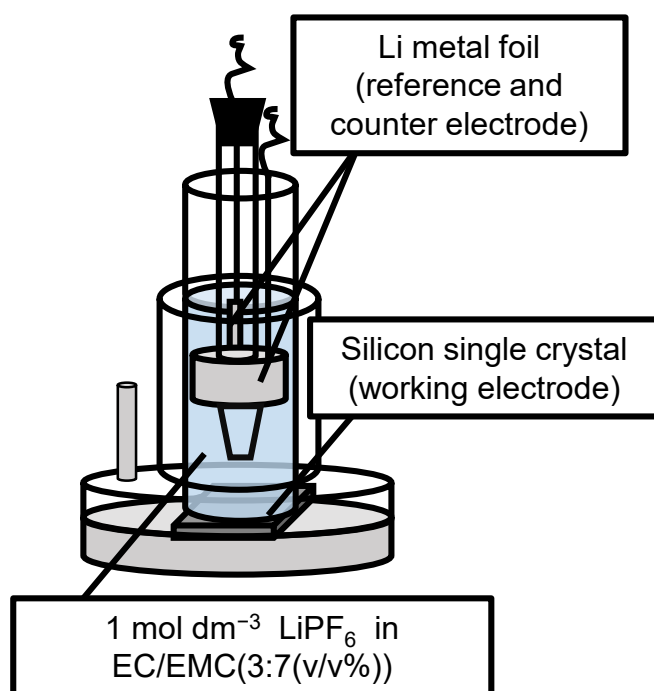

**Figure S1.** Schematic of the three-electrode electrochemical cell. Silicon single crystal was used as working electrode and Li metal was used as reference and counter electrode.

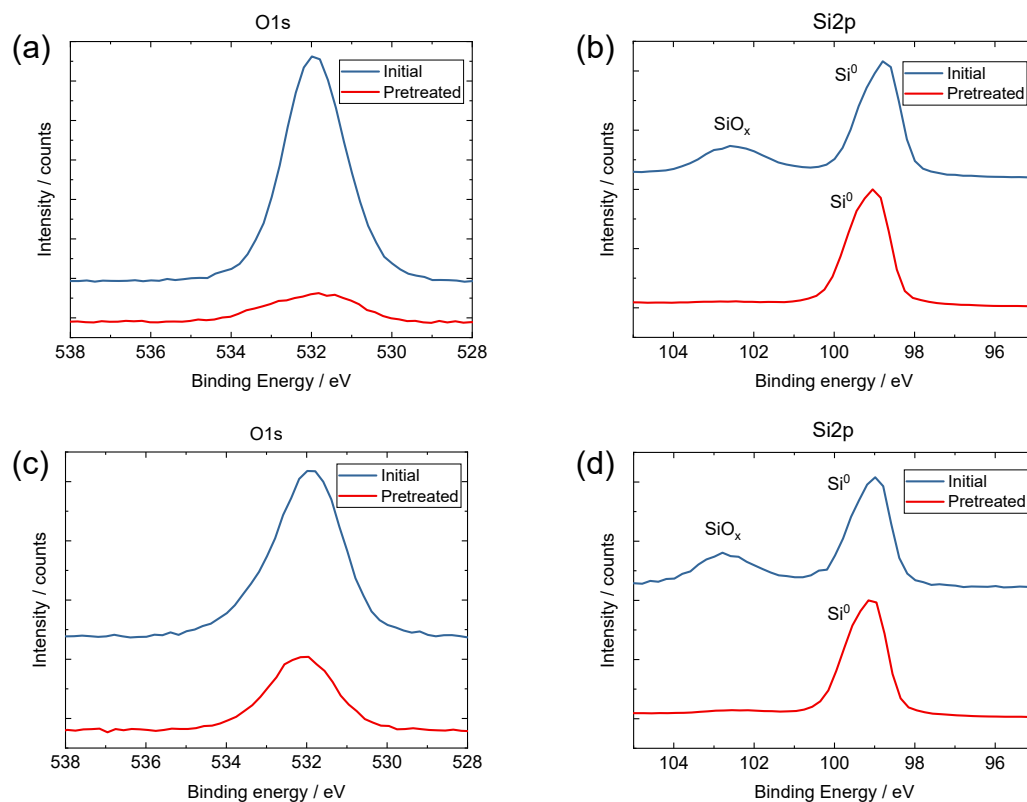

**Figure S2.** (a) O1s and (b) Si2p X-ray photoelectron (XPS) spectra of silicon (111) and (c) O1s and (d) Si2p XPS spectra of silicon (100) single crystal after being pretreated by piranha solution and hydrogen fluoride solution (red), and initial state one (blue). These spectra are normalized at Si2p peak top.

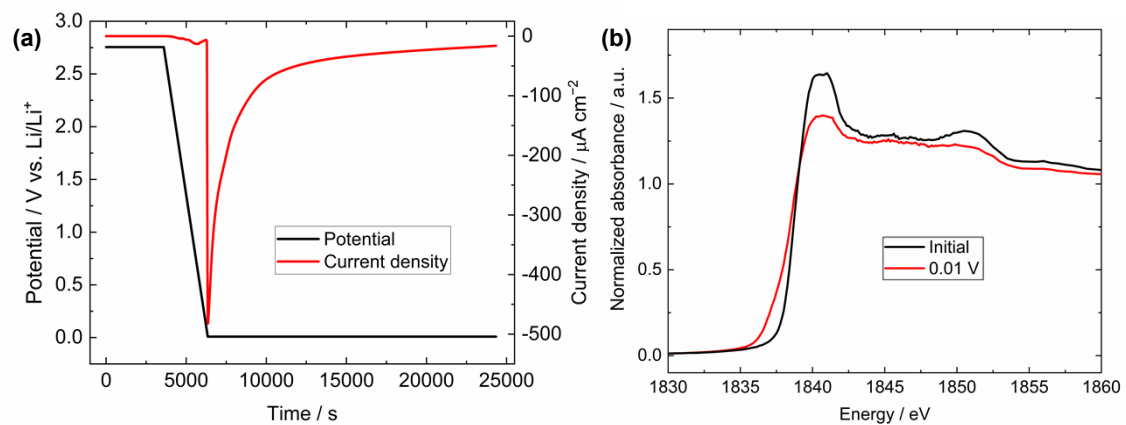

**Figure S3.** (a) LSV plot of Si (100), (b) Si K-edge XANES spectra of Si (100) after electrochemical Si-Li alloying reaction.

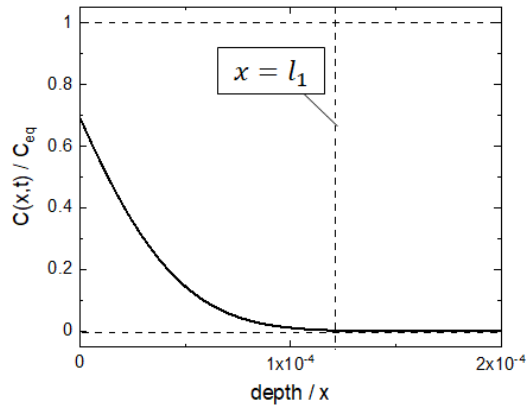

**Figure S4.** The simulated profile of concentration change to the reaction depth based on

the equation 
$$c(x,t) = c_{eq} \left[ \operatorname{erfc} \left( \frac{x}{2\sqrt{Dt}} \right) - \exp(-hx) \operatorname{erfc} \left( \frac{x}{2\sqrt{Dt}} + h\sqrt{Dt} \right) \right]$$
, assuming that  $k$  is  $5.0 \times 10^{-7} \text{ cm s}^{-1}$ ,  $D$  is  $1.0 \times 10^{-11} \text{ cm}^2 \text{ s}^{-1}$ , and  $\tau$  is 100 s.
